# Supplementary material
Source: PubMed Central journal article supplement (PMC6479254)
Supplement: Supp_Fig3.pdf [file Supp_Fig3.pdf]

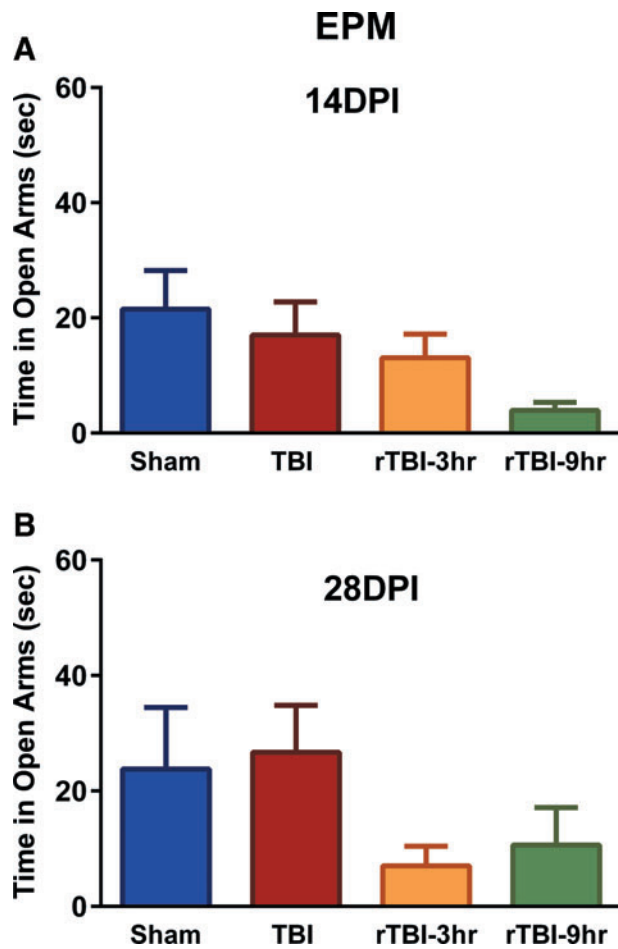

**SUPPLEMENTARY FIG. S3.** Elevated plus maze (EPM) was used to assess anxiety-like behavior measured by the time spent in the open arms of an elevated plus maze. (A) There was no significant effect on time spent in the open arms at 14 DPI ( $F_{(3,30)}=2.159$ ;  $p=0.1137$ ) or (B) 28 DPI ( $F_{(3,21)}=1.253$ ;  $p=0.3159$ ; mean  $\pm$  SEM; 14 DPI; sham,  $n=11$ ; TBI,  $n=8$ ; rTBI 3 h,  $n=6$ ; rTBI 9 h,  $n=9$ ; 28 DPI; sham,  $n=8$ ; TBI,  $n=5$ ; rTBI 3 h,  $n=6$ ; rTBI 9 h,  $n=6$ ). DPI, days post-injury; rTBI, repetitive traumatic brain injury; SEM, standard error of the mean.
