# Supplementary material
Source: PubMed Central journal article supplement (PMC6479254)
Supplement: Supp_Table6.pdf [file Supp_Table6.pdf]

SUPPLEMENTARY TABLE S6. REPETITIVE TBI RESULTED IN SLEEP DISTURBANCES, ACUTE SENSORIMOTOR AND AFFECTIVE DEFICITS (1–7 DAYS POST-INJURY), AND NEUROPATHOLOGY THAT PERSISTED TO 28 DAYS POST-INJURY

|                                          | <i>Sham</i> | <i>TBI</i> | <i>rTBI 3 h</i> | <i>rTBI 9 h</i> |
|------------------------------------------|-------------|------------|-----------------|-----------------|
| Acute cumulative sleep changes           | –           | –          | +               | –               |
| Acute sensorimotor deficits              | –           | +          | +               | +               |
| Acute affective behavioral deficits      | –           | –          | +               | –               |
| Acute cognitive deficits                 | –           | –          | –               | –               |
| Acute neuropathology                     | –           | –          | +               | +               |
| Persisting affective behavioral deficits | –           | –          | –               | –               |
| Persisting cognitive deficits            | –           | –          | –               | –               |
| Persisting neuropathology                | –           | –          | +               | +               |

A three hour inter-injury interval may be prognostic of a protracted recovery compared to a nine hour interval or a single diffuse TBI. TBI, traumatic brain injury; rTBI, repetitive TBI.
