# Supplementary material
Source: PubMed Central journal article supplement (PMC6479254)

# Open Field

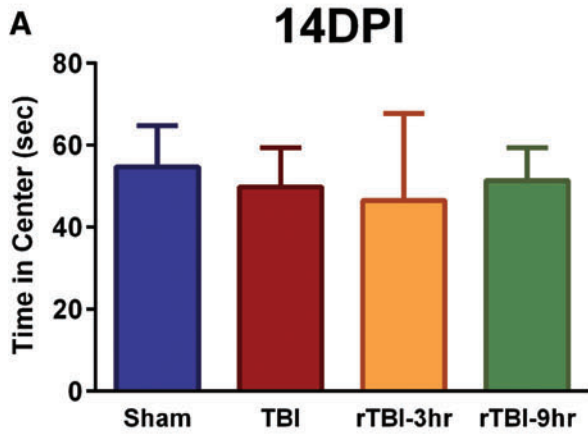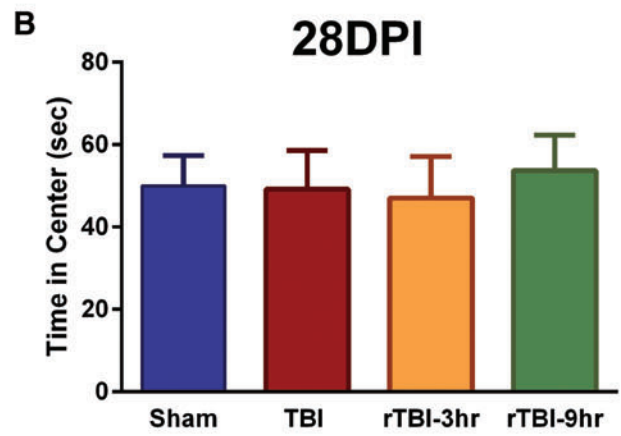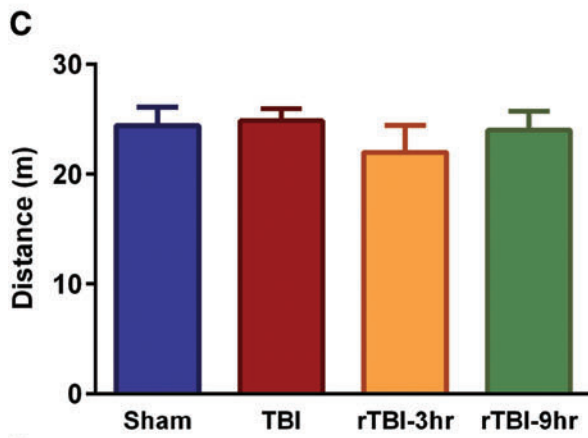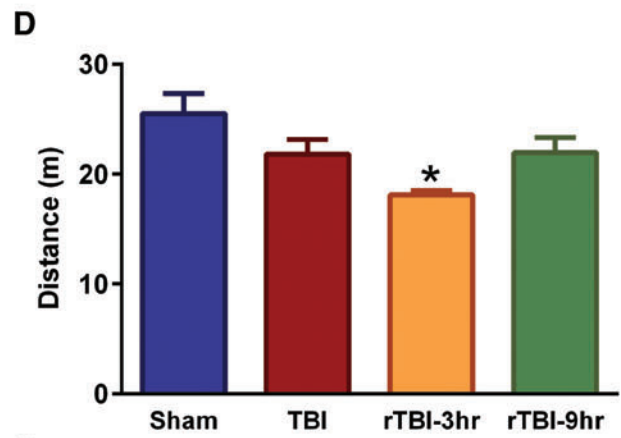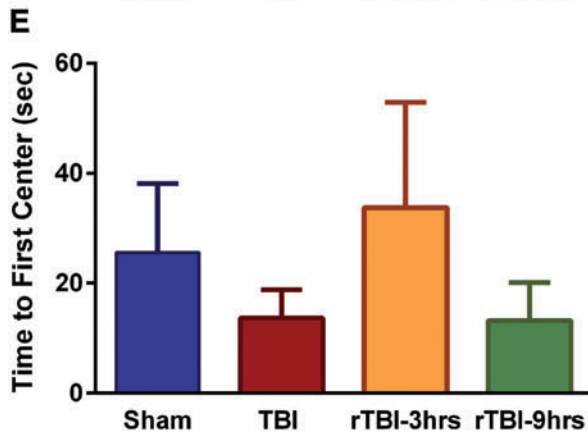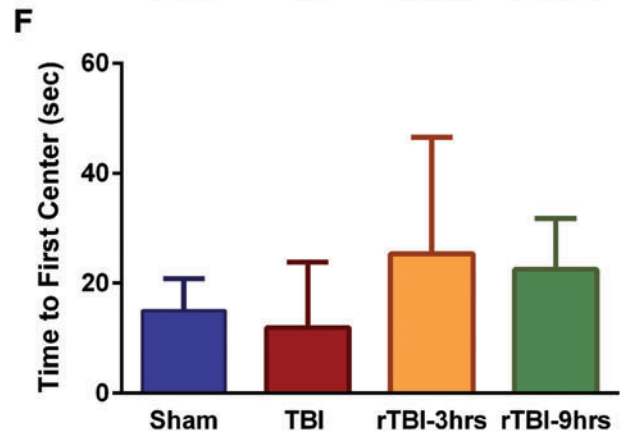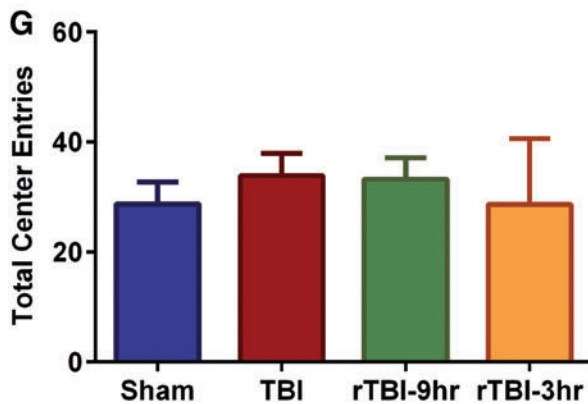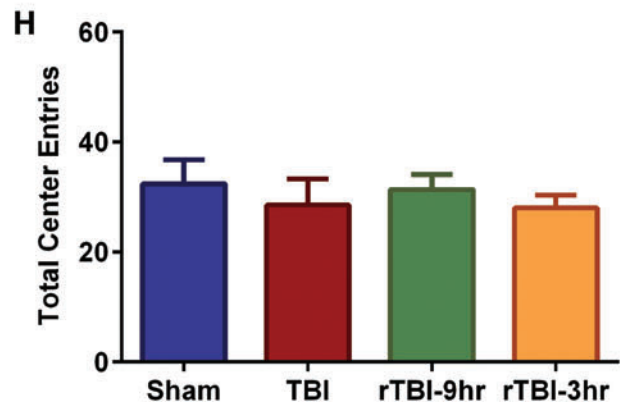

Supplement: Supp_Fig2.pdf [file Supp_Fig2.pdf]
